# Supplementary material for: The ability of oriental magpies (Pica serica) to solve baited multiple-string problems
Source: PeerJ. 2020 May 19;8:e9200. doi: 10.7717/peerj.9200 (PMC7243816; doi:10.7717/peerj.9200)
Supplement: Supplemental Information 1 — Oriental magpie individuals (P1–P8) solving the multiple-strings tasks (T1–T7). [file peerj-08-9200-s001.xlsx]

## Sheet: P1
Data of Task 1	start time	bait position	Correct	Selected side	Video file	Data of Task 2	start time	bait position	Correct	Selected side	Video file	Data of Task 5	start time	bait position	Correct	Selected side	Video file	Data of Task 6	start time	bait position	Correct	Selected side	Video file	Data of Task 7	start time	bait position	Correct	Selected side	Video file
2016-11-17	00:03:55	R	1	R	DSCN0412	2016-11-30	00:00:23	R	1	R	IMG_0185	2016-12-16	00:00:24	R	1	R	MVI_0716	2017-02-12	00:00:16	R	1	R	MVI_1680	2017-02-20	00:00:16	R	0	L	IMG_1622
2016-11-17	00:00:24	L	1	L	DSCN0414	2016-11-30	00:00:24	R	0	L	IMG_0186	2016-12-16	00:00:42	R	0	L	MVI_0720	2017-02-12	00:00:17	R	0	L	MVI_1682	2017-02-20	00:00:17	R	1	R	IMG_1623
2016-11-17	00:00:25	R	0	L	DSCN0415	2016-11-30	00:00:27	L	0	R	IMG_0187	2016-12-16	00:00:28	L	1	L	MVI_0721	2017-02-14	00:00:36	L	1	L	IMG_1440	2017-02-20	00:00:12	R	1	R	IMG_1624
2016-11-17	00:00:15	L	1	L	DSCN0416	2016-11-30	00:05:48	L	0	R	IMG_0188	2016-12-16	00:14:05	L	0	R	MVI_0723	2017-02-14	00:01:11	L	0	R	IMG_1448	2017-02-20	00:00:12	L	0	R	IMG_1625
2016-11-17	00:00:45	R	1	R	DSCN0417	2016-11-30	00:00:23	R	1	R	IMG_0189	2016-12-16	00:06:13	R	1	R	MVI_0726	2017-02-17	00:00:19	L	0	R	IMG_1519	2017-02-20	00:00:16	L	1	L	IMG_1626
2016-11-17	00:00:20	L	0	R	DSCN0418	2016-11-30	00:00:28	R	1	R	IMG_0190	2016-12-16	00:01:13	R	0	L	MVI_0727	2017-02-17	00:00:45	L	0	R	IMG_1520	2017-02-20	00:00:13	L	1	L	IMG_1627
2016-11-17	00:00:24	R	0	L	DSCN0419	2016-11-30	00:02:35	R	1	R	IMG_0193	2016-12-16	00:00:12	R	0	L	MVI_0728	2017-02-17	00:01:23	L	0	R	IMG_1521	2017-02-20	00:00:17	R	1	R	IMG_1628
2016-11-17	00:00:31	L	1	L	DSCN0420	2016-11-30	00:00:15	R	0	L	IMG_0194	2016-12-17	00:12:49	L	0	R	MVI_0735	2017-02-17	00:00:08	L	0	R	IMG_1522	2017-02-20	00:00:08	R	1	R	IMG_1632
2016-11-17	00:00:32	L	1	L	DSCN0421	2016-11-30	00:00:11	L	0	R	IMG_0195	2016-12-17	00:00:33	L	1	L	MVI_0738	2017-02-17	00:00:13	R	0	L	IMG_1523	2017-02-20	00:00:15	L	1	L	IMG_1633
2016-11-17	00:00:33	R	0	L	DSCN0423	2016-11-30	00:00:18	L	0	R	IMG_0196	2016-12-17	00:00:13	R	1	R	MVI_0739	2017-02-17	00:00:13	R	1	R	IMG_1524	2017-02-20	00:00:20	L	1	L	IMG_1634
2016-11-22	00:00:51	R	0	L	MVI_0388	2016-12-01	00:09:24	L	1	L	IMG_0236	2016-12-17	00:00:13	R	0	L	MVI_0740	2017-02-17	00:00:12	R	1	R	IMG_1526	2017-02-21	00:00:43	R	0	L	IMG_1672
2016-11-22	00:00:36	L	0	R	MVI_0390	2016-12-01	00:00:29	L	0	R	IMG_0237	2016-12-17	00:01:15	R	1	R	MVI_0742	2017-02-17	00:00:16	L	0	R	IMG_1527	2017-02-21	00:00:16	R	0	L	IMG_1673
2016-11-22	00:00:16	R	1	R	MVI_0392	2016-12-01	00:02:13	R	1	R	IMG_0238	2016-12-17	00:00:16	R	0	L	MVI_0743	2017-02-17	00:00:15	R	0	L	IMG_1528	2017-02-21	00:00:19	R	0	L	IMG_1674
2016-11-22	00:01:38	L	1	L	MVI_0393	2016-12-01	00:00:15	R	0	L	IMG_0240	2016-12-17	00:00:15	L	0	R	MVI_0744	2017-02-17	00:00:17	R	1	R	IMG_1529	2017-02-21	00:00:17	L	0	R	IMG_1675
2016-11-22	00:00:13	R	0	L	MVI_0394	2016-12-01	00:00:13	R	1	R	IMG_0241	2016-12-17	00:01:00	R	0	L	MVI_0745	2017-02-18	00:00:09	R	0	L	IMG_1542	2017-02-21	00:00:54	L	1	L	IMG_1676
2016-11-22	00:00:14	L	1	L	MVI_0395	2016-12-01	00:00:09	R	0	L	IMG_0242	2016-12-17	00:00:08	R	0	L	MVI_0746	2017-02-18	00:00:15	R	0	L	IMG_1543	2017-02-21	00:00:13	L	0	R	IMG_1680
2016-11-22	00:00:10	R	0	L	MVI_0396	2016-12-01	00:03:29	L	0	R	IMG_0243	2016-12-17	00:09:19	L	0	R	MVI_0748	2017-02-18	00:00:10	R	1	R	IMG_1544	2017-02-21	00:00:13	R	0	L	IMG_1681
2016-11-22	00:02:15	L	1	L	MVI_0397	2016-12-01	00:00:28	R	1	R	IMG_0244	2016-12-18	00:00:09	R	1	R	IMG_0458	2017-02-18	00:00:15	L	1	L	IMG_1545	2017-02-21	00:00:13	R	1	R	IMG_1682
2016-11-22	00:10:54	R	1	R	MVI_0399	2016-12-01	00:00:20	L	0	R	IMG_0246	2016-12-18	00:00:08	R	1	R	IMG_0459	2017-02-18	00:00:08	L	1	L	IMG_1546	2017-02-21	00:00:15	R	1	R	IMG_1683
2016-11-22	00:05:08	L	0	R	MVI_0401	2016-12-01	00:00:12	R	1	R	IMG_0247	2016-12-26	00:00:16	R	0	L	IMG_0536	2017-02-18	00:00:11	L	0	R	IMG_1547	2017-02-21	00:05:22	L	1	L	IMG_1688
2016-11-23	00:00:30	R	1	R	IMG_0045	2016-12-27	00:00:22	L	0	R	IMG_0548	2016-12-26	00:01:54	R	0	L	IMG_0537	2017-02-18	00:00:13	R	1	R	IMG_1548	2017-02-22	00:00:42	L	1	L	MVI_2027
2016-11-23	00:00:10	L	0	R	IMG_0046	2016-12-27	00:00:12	L	0	R	IMG_0549	2016-12-26	00:00:33	L	0	R	IMG_0538	2017-02-18	00:00:10	R	1	R	IMG_1549	2017-02-22	00:00:21	L	1	L	MVI_2029
2016-11-23	00:00:09	R	1	R	IMG_0047	2016-12-27	00:01:04	R	1	R	IMG_0551	2016-12-26	00:01:43	L	0	R	IMG_0539	2017-02-19	00:00:23	L	1	L	MVI_1908	2017-02-22	00:00:19	L	1	L	MVI_2030
2016-11-23	00:00:20	L	1	L	IMG_0048	2016-12-27	00:00:35	R	1	R	IMG_0552	2016-12-26	00:01:45	R	1	R	IMG_0540	2017-02-19	00:00:13	L	1	L	MVI_1909	2017-02-23	00:00:18	L	1	L	MVI_2032
2016-11-23	00:00:21	R	1	R	IMG_0049	2016-12-27	00:00:24	L	0	R	IMG_0553	2016-12-26	00:04:32	L	0	R	IMG_0542	2017-02-19	00:00:16	R	1	R	MVI_1911	2017-02-23	00:02:30	L	1	L	MVI_2033
2016-11-23	00:00:28	R	1	R	IMG_0050	2016-12-27	00:00:39	L	0	R	IMG_0554	2016-12-26	00:05:16	R	0	L	IMG_0543	2017-02-19	00:00:14	R	1	R	MVI_1912	2017-02-23	00:00:23	L	1	L	MVI_2034
2016-11-23	00:02:12	L	1	L	IMG_0051	2016-12-27	00:01:08	R	1	R	IMG_0555	2016-12-26	00:01:25	R	0	L	IMG_0544	2017-02-19	00:00:18	L	1	L	MVI_1913	2017-03-09	00:00:15	R	0	L	IMG_2078
2016-11-23	00:05:41	R	1	R	IMG_0052	2016-12-27	00:02:36	R	0	L	IMG_0556	2016-12-26	00:06:12	L	0	R	IMG_0545	2017-02-19	00:00:15	L	1	L	MVI_1914	2017-03-09	00:00:08	R	0	L	IMG_2079
2016-11-23	00:00:25	L	1	L	IMG_0053	2016-12-27	00:00:56	L	0	R	IMG_0557	2016-12-26	00:03:12	R	0	L	IMG_0546	2017-02-19	00:00:22	R	1	R	MVI_1915	2017-03-09	00:00:16	L	1	L	IMG_2080
2017-01-20	00:04:45	R	0	L	IMG_0908	2016-12-27	00:02:22	R	1	R	IMG_0558	2017-01-26	00:04:25	L	1	L	MVI_1313	2017-02-19	00:00:22	R	1	R	MVI_1916	2017-03-09	00:00:10	L	0	R	IMG_2081

## Sheet: P2
Data of Task 1	start time	bait position	Correct	Selected side	Video file	Data of Task 2	start time	bait position	Correct	Selected side	Video file	Data of Task 3	start time	bait position	Correct	Selected side	Video file	Data of Task 4	start time	bait position	Correct	Selected side	Video file	Data of Task 5	start time	bait position	Correct	Selected side	Video file	Data of Task 6	start time	bait position	Correct	Selected side	Video file	Data of Task 7	start time	bait position	Correct	Selected side	Video file
2016-11-18	00:00:12	R	0	L	DSCN0457	2016-11-29	00:00:08	R	0	L	IMG_0143	2017-08-15	00:00:25	L	1	L	2017_0415_030327_005	2017-08-20	00:00:22	L	1	L	2017_0420_023825_001	2016-12-14	00:00:13	R	0	L	IMG_0325	2017-02-14	00:00:39	R	0	L	IMG_1427	2017-02-18	00:00:38	R	0	L	MVI_1898
2016-11-18	00:00:16	L	1	L	DSCN0458	2016-11-29	00:00:08	L	1	L	IMG_0144	2017-08-15	00:00:29	L	1	L	2017_0415_043449_015	2017-08-20	00:02:16	L	1	L	2017_0420_024518_002	2016-12-14	00:00:17	R	0	L	IMG_0326	2017-02-14	00:00:12	R	0	L	IMG_1428	2017-02-18	00:00:10	R	1	R	MVI_1899
2016-11-18	00:00:07	R	0	L	DSCN0459	2016-11-29	00:00:08	L	1	L	IMG_0145	2017-08-15	00:01:05	R	0	L	2017_0415_044535_017	2017-08-20	00:00:54	R	1	R	2017_0420_025744_004	2016-12-14	00:00:09	L	0	R	IMG_0327	2017-02-14	00:00:15	L	0	R	IMG_1429	2017-02-18	00:00:26	R	0	L	MVI_1900
2016-11-18	00:00:07	L	0	R	DSCN0460	2016-11-29	00:00:07	L	1	L	IMG_0146	2017-08-15	00:01:00	L	1	L	2017_0415_045242_018	2017-08-20	00:04:01	R	1	R	2017_0420_030949_006	2016-12-14	00:00:08	L	1	L	IMG_0328	2017-02-14	00:00:30	L	1	L	IMG_1430	2017-02-18	00:00:11	L	1	L	MVI_1901
2016-11-18	00:00:07	R	0	L	DSCN0461	2016-11-29	00:02:05	R	1	R	IMG_0147	2017-08-15	00:02:04	R	0	L	2017_0415_055302_026	2017-08-20	00:01:54	R	0	L	2017_0420_031924_007	2016-12-14	00:00:07	L	1	L	IMG_0329	2017-02-14	00:00:23	R	0	L	IMG_1431	2017-02-18	00:00:10	L	0	R	MVI_1902
2016-11-18	00:00:07	L	1	L	DSCN0462	2016-11-29	00:00:09	R	1	R	IMG_0148	2017-08-15	00:00:18	L	0	R	2017_0415_055745_027	2017-08-20	00:02:04	L	1	L	2017_0420_033202_008	2016-12-14	00:00:07	R	0	L	IMG_0330	2017-02-14	00:00:20	R	0	L	IMG_1432	2017-02-18	00:00:20	L	1	L	MVI_1903
2016-11-18	00:00:09	R	0	L	DSCN0463	2016-11-29	00:00:09	L	1	L	IMG_0149	2017-08-16	00:00:29	L	1	L	2017_0416_034253_001	2017-08-20	00:01:07	L	0	R	2017_0420_040512_012	2016-12-14	00:00:06	R	0	L	IMG_0331	2017-02-14	00:01:02	R	0	L	IMG_1433	2017-02-18	00:01:30	R	0	L	MVI_1904
2016-11-18	00:00:09	L	1	L	DSCN0464	2016-11-29	00:01:42	L	0	R	IMG_0150	2017-08-16	00:00:32	R	0	L	2017_0416_035223_002	2017-08-20	00:01:04	R	1	R	2017_0420_042448_014	2016-12-14	00:00:22	L	0	R	IMG_0332	2017-02-14	00:00:26	L	1	L	IMG_1434	2017-02-18	00:00:37	R	0	L	MVI_1905
2016-11-18	00:00:07	R	0	L	DSCN0465	2016-11-29	00:00:40	R	0	L	IMG_0151	2017-08-16	00:00:25	L	1	L	2017_0416_035714_003	2017-08-20	00:01:31	L	0	R	2017_0420_043752_016	2016-12-14	00:00:42	L	0	R	IMG_0333	2017-02-14	00:00:11	L	1	L	IMG_1436	2017-02-18	00:00:30	L	1	L	MVI_1906
2016-11-18	00:00:06	L	1	L	DSCN0466	2016-11-29	00:00:17	L	1	L	IMG_0152	2017-08-16	00:01:32	L	1	L	2017_0416_040304_004	2017-08-20	00:00:57	R	1	R	2017_0420_045356_018	2016-12-14	00:00:19	L	1	L	IMG_0334	2017-02-14	00:00:16	L	1	L	IMG_1437	2017-02-18	00:00:27	L	1	L	MVI_1907
2016-11-22	00:00:09	R	1	R	IMG_0018	2016-11-30	00:00:12	L	1	L	MVI_0551	2017-08-16	00:00:30	R	0	L	2017_0416_041402_005	2017-08-21	00:01:52	R	1	R	2017_0421_022900_001	2016-12-18	00:00:12	R	0	L	IMG_0559	2017-02-15	00:02:01	L	0	R	IMG_1477	2017-02-19	00:00:22	R	0	L	MVI_1944
2016-11-22	00:00:06	L	1	L	IMG_0019	2016-11-30	00:00:31	L	1	L	MVI_0552	2017-08-16	00:01:45	R	1	R	2017_0416_042145_006	2017-08-21	00:02:23	L	0	R	2017_0421_023931_002	2016-12-18	00:00:07	R	0	L	IMG_0560	2017-02-15	00:01:32	L	1	L	IMG_1478	2017-02-19	00:00:15	R	0	L	MVI_1945
2016-11-22	00:00:05	R	0	L	IMG_0020	2016-11-30	00:00:08	R	0	L	MVI_0553	2017-08-16	00:01:29	R	1	R	2017_0416_044450_010	2017-08-21	00:01:21	L	1	L	2017_0421_024615_003	2016-12-18	00:00:06	L	1	L	IMG_0561	2017-02-15	00:00:37	L	1	L	IMG_1479	2017-02-19	00:00:14	R	0	L	MVI_1946
2016-11-22	00:00:09	L	1	L	IMG_0021	2016-11-30	00:00:06	R	0	L	MVI_0554	2017-08-16	00:03:10	L	1	L	2017_0416_045639_012	2017-08-21	00:01:20	L	1	L	2017_0421_025545_004	2016-12-18	00:00:06	L	1	L	IMG_0562	2017-02-15	00:00:23	L	1	L	IMG_1480	2017-02-19	00:00:08	L	1	L	MVI_1947
2016-11-22	00:00:09	R	0	L	IMG_0022	2016-11-30	00:00:08	R	0	L	MVI_0555	2017-08-16	00:00:40	L	1	L	2017_0416_051140_014	2017-08-21	00:02:45	R	1	R	2017_0421_030143_005	2016-12-18	00:00:06	R	0	L	IMG_0563	2017-02-15	00:00:39	R	0	L	IMG_1481	2017-02-19	00:00:09	L	1	L	MVI_1948
2016-11-22	00:00:05	L	1	L	IMG_0023	2016-11-30	00:00:08	L	1	L	MVI_0556	2017-08-16	00:05:22	L	1	L	2017_0416_052437_016	2017-08-21	00:03:49	R	0	L	2017_0421_052713_009	2016-12-18	00:00:09	R	0	L	IMG_0564	2017-02-15	00:00:23	R	1	R	IMG_1482	2017-02-19	00:00:16	L	1	L	MVI_1949
2016-11-22	00:00:07	R	0	L	IMG_0024	2016-11-30	00:00:15	L	0	R	MVI_0557	2017-08-17	00:00:16	L	1	L	2017_0417_023355_001	2017-08-21	00:01:15	R	1	R	2017_0421_054444_011	2016-12-18	00:00:08	L	1	L	IMG_0565	2017-02-15	00:00:09	R	0	L	IMG_1483	2017-02-19	00:00:10	R	0	L	MVI_1950
2016-11-22	00:00:05	L	1	L	IMG_0025	2016-11-30	00:00:10	L	0	R	MVI_0558	2017-08-17	00:01:38	R	1	R	2017_0417_024400_002	2017-08-21	00:00:55	L	0	R	2017_0421_060112_013	2016-12-18	00:00:06	R	0	L	IMG_0566	2017-02-15	00:00:12	R	0	L	IMG_1484	2017-02-19	00:00:09	R	0	L	MVI_1951
2016-11-22	00:00:05	L	1	L	IMG_0026	2016-11-30	00:00:08	R	0	L	MVI_0559	2017-08-17	00:00:14	L	0	R	2017_0417_025649_004	2017-08-21	00:01:32	L	1	L	2017_0421_061103_014	2016-12-18	00:00:11	L	0	R	IMG_0567	2017-02-15	00:00:11	L	1	L	IMG_1486	2017-02-19	00:00:10	L	1	L	MVI_1952
2016-11-22	00:00:07	R	0	L	IMG_0027	2016-11-30	00:00:07	R	0	L	MVI_0560	2017-08-17	00:00:54	R	0	L	2017_0417_030947_006	2017-08-22	00:00:55	L	0	R	2017_0422_022102_001	2016-12-18	00:00:07	R	1	R	IMG_0568	2017-02-15	00:00:11	L	1	L	IMG_1487	2017-02-19	00:00:12	L	1	L	MVI_1953
2016-11-23	00:00:17	R	0	L	IMG_0055	2016-12-01	00:00:07	L	1	L	MVI_0607	2017-08-17	00:02:41	L	1	L	2017_0417_032237_008	2017-08-22	00:01:23	L	1	L	2017_0422_022654_002	2016-12-27	00:00:08	R	0	L	MVI_0761	2017-02-17	00:09:32	R	1	R	IMG_1532	2017-02-20	00:01:19	R	0	L	IMG_1649
2016-11-23	00:00:09	L	1	L	IMG_0056	2016-12-01	00:00:07	L	1	L	MVI_0608	2017-08-17	00:00:59	R	1	R	2017_0417_033754_010	2017-08-22	00:02:38	L	1	L	2017_0422_023241_004	2016-12-27	00:00:09	R	1	R	MVI_0762	2017-02-17	00:04:11	L	0	R	IMG_1533	2017-02-20	00:00:14	R	0	L	IMG_1650
2016-11-23	00:00:07	R	0	L	IMG_0057	2016-12-01	00:00:07	R	0	L	MVI_0609	2017-08-17	00:04:55	L	1	L	2017_0417_035027_012	2017-08-22	00:02:08	R	0	L	2017_0422_024933_006	2016-12-27	00:00:06	L	1	L	MVI_0763	2017-02-17	00:00:41	L	0	R	IMG_1534	2017-02-20	00:00:13	R	0	L	IMG_1651
2016-11-23	00:00:05	L	1	L	IMG_0058	2016-12-01	00:00:06	R	0	L	MVI_0610	2017-08-17	00:01:06	R	0	L	2017_0417_040151_014	2017-08-22	00:00:22	R	1	R	2017_0422_053411_010	2016-12-27	00:00:12	L	1	L	MVI_0764	2017-02-17	00:00:22	R	1	R	IMG_1535	2017-02-20	00:00:09	L	0	R	IMG_1652
2016-11-23	00:00:09	R	1	R	IMG_0059	2016-12-01	00:00:06	R	0	L	MVI_0611	2017-08-17	00:05:58	R	0	L	2017_0417_040956_015	2017-08-22	00:00:36	L	0	R	2017_0422_053713_011	2016-12-27	00:00:07	R	0	L	MVI_0765	2017-02-17	00:00:18	R	1	R	IMG_1536	2017-02-20	00:00:10	L	1	L	IMG_1653
2016-11-23	00:00:06	L	1	L	IMG_0060	2016-12-01	00:00:07	L	1	L	MVI_0612	2017-08-18	00:04:04	L	1	L	2017_0418_031814_001	2017-08-22	00:02:18	L	0	R	2017_0422_055419_014	2016-12-27	00:00:06	R	0	L	MVI_0766	2017-02-17	00:00:12	R	1	R	IMG_1537	2017-02-20	00:00:09	L	1	L	IMG_1654
2016-11-23	00:00:09	R	0	L	IMG_0061	2016-12-01	00:00:06	R	0	L	MVI_0613	2017-08-18	00:02:18	R	0	L	2017_0418_032747_002	2017-08-22	00:01:08	R	0	L	2017_0422_061012_016	2016-12-27	00:00:10	L	0	R	MVI_0767	2017-02-17	00:00:24	L	0	R	IMG_1538	2017-02-20	00:00:15	R	0	L	IMG_1655
2016-11-23	00:00:09	L	1	L	IMG_0062	2016-12-01	00:00:19	L	0	R	MVI_0614	2017-08-18	00:02:20	L	1	L	2017_0418_034453_004	2017-08-22	00:04:38	R	0	L	2017_0422_063416_019	2016-12-27	00:00:07	L	1	L	MVI_0768	2017-02-17	00:00:41	L	0	R	IMG_1539	2017-02-20	00:00:10	R	0	L	IMG_1656
2016-11-23	00:00:05	R	0	L	IMG_0063	2016-12-01	00:00:17	L	0	R	MVI_0615	2017-08-18	00:01:06	R	1	R	2017_0418_035905_006	2017-08-23	00:00:29	R	0	L	2017_0423_040351_002	2016-12-27	00:00:10	R	0	L	MVI_0769	2017-02-17	00:01:04	R	1	R	IMG_1540	2017-02-20	00:00:12	L	1	L	IMG_1657
2016-11-23	00:00:11	L	0	R	IMG_0064	2016-12-01	00:00:12	R	0	L	MVI_0616	2017-08-18	00:01:00	L	1	L	2017_0418_040758_007	2017-08-23	00:00:32	L	1	L	2017_0423_065139_008	2016-12-27	00:00:10	L	1	L	MVI_0770	2017-02-17	00:00:11	R	1	R	IMG_1541	2017-02-20	00:00:18	L	1	L	IMG_1658

## Sheet: P3
Data of Task 1	start time	bait position	Correct	Selected side	Video file	Data of Task 2	start time	bait position	Correct	Selected side	Video file	Data of Task 5	start time	bait position	Correct	Selected side	Video file	Data of Task 6	start time	bait position	Correct	Selected side	Video file	Data of Task 7	start time	bait position	Correct	Selected side	Video file
2016-11-18	00:00:45	R	0	L	MVI_0326	2016-11-30	00:04:41	L	1	L	IMG_0219	2016-12-18	00:00:19	L	0	R	IMG_0434	2017-02-15	00:00:12	R	0	L	MVI_1785	2017-02-19	00:00:57	L	1	L	IMG_1608
2016-11-18	00:07:55	R	1	R	MVI_0331	2016-11-30	00:00:48	R	0	L	IMG_0221	2016-12-18	00:00:10	L	0	R	IMG_0435	2017-02-15	00:00:12	R	0	L	MVI_1786	2017-02-19	00:00:54	L	1	L	IMG_1609
2016-11-18	00:01:03	L	0	R	MVI_0332	2016-12-01	00:03:30	L	1	L	IMG_0252	2016-12-18	00:00:12	R	1	R	IMG_0436	2017-02-15	00:00:14	R	0	L	MVI_1787	2017-02-19	00:00:32	R	0	L	IMG_1610
2016-11-18	00:14:16	R	0	L	MVI_0333	2016-12-01	00:08:48	R	0	L	IMG_0254	2016-12-18	00:00:30	R	1	R	IMG_0437	2017-02-15	00:00:08	R	0	L	MVI_1788	2017-02-19	00:02:03	R	0	L	IMG_1611
2016-11-22	00:00:48	L	0	R	IMG_0042	2016-12-01	00:06:21	R	0	L	IMG_0255	2016-12-18	00:00:30	L	0	R	IMG_0438	2017-02-15	00:00:08	L	1	L	MVI_1789	2017-02-19	00:04:22	L	1	L	IMG_1613
2016-11-22	00:00:35	L	1	L	IMG_0043	2016-12-01	00:00:25	R	0	L	IMG_0256	2016-12-18	00:03:00	L	0	R	IMG_0439	2017-02-15	00:00:09	L	1	L	MVI_1790	2017-02-19	00:03:28	L	1	L	IMG_1614
2016-11-23	00:01:28	R	0	L	IMG_0066	2016-12-01	00:06:38	L	1	L	IMG_0257	2016-12-18	00:03:26	R	1	R	IMG_0440	2017-02-15	00:00:08	L	1	L	MVI_1791	2017-02-19	00:02:20	L	1	L	IMG_1617
2016-11-23	00:01:11	L	1	L	IMG_0068	2016-12-01	00:05:24	R	0	L	IMG_0258	2016-12-18	00:00:49	R	1	R	IMG_0441	2017-02-15	00:00:09	L	1	L	MVI_1792	2017-02-19	00:02:40	R	0	L	IMG_1618
2016-11-23	00:11:33	R	0	L	IMG_0069	2016-12-01	00:03:30	L	1	L	IMG_0259	2016-12-18	00:01:06	L	1	L	IMG_0442	2017-02-15	00:00:09	R	0	L	MVI_1793	2017-02-19	00:01:33	R	0	L	IMG_1619
2016-11-23	00:00:32	L	1	L	IMG_0072	2016-12-01	00:01:44	L	1	L	IMG_0260	2016-12-18	00:02:53	R	1	R	IMG_0443	2017-02-15	00:00:11	R	0	L	MVI_1794	2017-02-19	00:03:34	R	0	L	IMG_1621
2016-11-23	00:00:30	R	0	L	IMG_0073	2016-12-01	00:14:52	R	0	L	IMG_0262	2016-12-26	00:00:31	L	0	R	MVI_0867	2017-02-16	00:05:13	R	0	L	IMG_1502	2017-02-20	00:00:59	R	0	L	MVI_1964
2016-11-23	00:00:29	L	1	L	IMG_0075	2016-12-14	00:04:32	L	1	L	MVI_0705	2016-12-26	00:00:38	R	1	R	MVI_0868	2017-02-16	00:01:32	R	0	L	IMG_1503	2017-02-20	00:00:25	R	0	L	MVI_1965
2016-11-23	00:01:09	R	0	L	IMG_0076	2016-12-14	00:01:27	R	0	L	MVI_0706	2016-12-26	00:00:16	L	0	R	MVI_0869	2017-02-16	00:00:42	L	1	L	IMG_1507	2017-02-20	00:00:14	R	0	L	MVI_1966
2016-11-28	00:00:32	R	0	L	MVI_0490	2016-12-14	00:02:38	R	0	L	MVI_0707	2016-12-26	00:00:21	L	0	R	MVI_0870	2017-02-16	00:00:09	L	1	L	IMG_1508	2017-02-20	00:00:15	L	1	L	MVI_1967
2016-11-28	00:05:46	L	1	L	MVI_0491	2016-12-14	00:02:52	L	1	L	MVI_0708	2016-12-26	00:00:44	R	0	L	MVI_0871	2017-02-16	00:00:09	L	1	L	IMG_1509	2017-02-20	00:05:44	L	1	L	MVI_1968
2016-11-28	00:03:34	L	1	L	MVI_0492	2016-12-14	00:06:26	R	0	L	MVI_0709	2016-12-26	00:11:12	R	1	R	MVI_0872	2017-02-16	00:00:15	R	0	L	IMG_1510	2017-02-20	00:05:01	L	1	L	MVI_1969
2016-11-28	00:01:11	R	0	L	MVI_0493	2016-12-14	00:02:04	R	0	L	MVI_0710	2016-12-26	00:06:53	L	1	L	MVI_0873	2017-02-16	00:01:01	R	0	L	IMG_1511	2017-02-20	00:03:02	R	0	L	MVI_1970
2016-11-28	00:03:58	L	1	L	MVI_0494	2016-12-14	00:02:48	R	0	L	MVI_0711	2016-12-26	00:01:41	L	0	R	MVI_0874	2017-02-16	00:00:08	L	1	L	IMG_1512	2017-02-20	00:03:33	R	0	L	MVI_1971
2016-11-28	00:12:19	R	0	L	MVI_0495	2016-12-14	00:07:48	R	0	L	MVI_0713	2016-12-30	00:07:05	L	1	L	MVI_0955	2017-02-16	00:00:31	L	1	L	IMG_1513	2017-02-20	00:02:13	L	1	L	MVI_1972
2016-11-28	00:06:40	L	1	L	MVI_0496	2016-12-14	00:01:15	L	0	R	MVI_0714	2016-12-30	00:00:44	R	1	R	MVI_0960	2017-02-16	00:00:23	L	1	L	IMG_1514	2017-02-20	00:07:01	L	0	R	MVI_1974
2016-11-28	00:14:51	R	0	L	MVI_0497	2017-01-19	00:10:24	L	1	L	IMG_0898	2016-12-30	00:01:43	R	1	R	MVI_0961	2017-02-18	00:00:46	R	1	R	IMG_1550	2017-02-21	00:01:41	R	0	L	MVI_2012
2016-11-28	00:01:56	R	0	L	MVI_0498	2017-01-24	00:08:59	L	0	R	MVI_1286	2016-12-30	00:10:47	L	1	L	MVI_0962	2017-02-18	00:00:22	R	0	L	IMG_1551	2017-02-21	00:00:54	R	0	L	MVI_2013
2016-11-29	00:01:06	L	1	L	MVI_0511	2017-01-24	00:01:57	R	1	R	MVI_1287	2016-12-30	00:03:38	R	1	R	MVI_0964	2017-02-18	00:00:20	L	1	L	IMG_1552	2017-02-21	00:03:32	R	0	L	MVI_2014
2016-11-29	00:03:10	R	0	L	MVI_0512	2017-01-24	00:00:46	L	0	R	MVI_1288	2017-01-25	00:00:28	R	1	R	MVI_1307	2017-02-18	00:00:42	L	0	R	IMG_1553	2017-02-21	00:00:37	L	1	L	MVI_2015
2016-11-29	00:05:21	L	1	L	MVI_0513	2017-01-24	00:00:35	R	0	L	MVI_1289	2017-01-25	00:00:15	L	0	R	MVI_1308	2017-02-18	00:00:44	R	0	L	IMG_1555	2017-02-21	00:01:33	L	1	L	MVI_2016
2016-11-29	00:06:21	R	0	L	MVI_0514	2017-01-24	00:00:41	L	0	R	MVI_1290	2017-01-25	00:00:15	R	1	R	MVI_1309	2017-02-18	00:06:00	R	0	L	IMG_1557	2017-02-21	00:01:55	L	1	L	MVI_2017
2016-11-29	00:06:17	R	0	L	MVI_0515	2017-01-24	00:00:58	R	1	R	MVI_1291	2017-01-25	00:00:17	L	0	R	MVI_1310	2017-02-18	00:05:25	L	1	L	IMG_1559	2017-02-21	00:00:38	R	0	L	MVI_2018
2016-11-29	00:09:36	R	0	L	MVI_0518	2017-01-24	00:00:37	L	1	L	MVI_1292	2017-01-25	00:00:38	R	1	R	MVI_1311	2017-02-18	00:05:33	L	1	L	IMG_1561	2017-02-21	00:02:35	R	0	L	MVI_2019
2016-11-29	00:20:24	R	0	L	MVI_0523	2017-01-24	00:00:09	R	0	L	MVI_1752	2017-01-25	00:05:28	R	1	R	MVI_1749	2017-02-18	00:00:30	R	0	L	IMG_1563	2017-02-21	00:02:28	L	1	L	MVI_2020
2016-11-29	00:11:04	L	1	L	MVI_0525	2017-01-24	00:00:09	L	1	L	MVI_1753	2017-02-14	00:00:16	L	0	R	MVI_1751	2017-02-18	00:01:02	R	0	L	IMG_1564	2017-02-21	00:01:01	L	1	L	MVI_2021

## Sheet: P4
Data of Task 1	start time	bait position	Correct	Selected side	Video file	Data of Task 2	start time	bait position	Correct	Selected side	Video file	Data of Task 5	start time	bait position	Correct	Selected side	Video file	Data of Task 6	start time	bait position	Correct	Selected side	Video file	Data of Task 7	start time	bait position	Correct	Selected side	Video file
2016-11-17	00:00:09	R	0	L	DSCN0430	2016-11-30	00:00:11	R	0	L	MVI_0527	2016-12-16	00:00:09	R	0	L	IMG_0382	2017-02-12	00:02:41	R	0	L	IMG_1406	2017-02-18	00:03:13	L	1	L	MVI_1886
2016-11-17	00:00:07	L	1	L	DSCN0431	2016-11-30	00:00:09	L	1	L	MVI_0528	2016-12-16	00:00:11	L	1	L	IMG_0383	2017-02-12	00:00:15	R	0	L	IMG_1407	2017-02-18	00:00:14	L	1	L	MVI_1887
2016-11-17	00:00:08	R	1	R	DSCN0432	2016-11-30	00:00:10	L	1	L	MVI_0529	2016-12-16	00:00:11	L	1	L	IMG_0384	2017-02-12	00:00:13	L	1	L	IMG_1408	2017-02-18	00:00:16	R	0	L	MVI_1888
2016-11-17	00:00:09	L	1	L	DSCN0433	2016-11-30	00:00:15	R	0	L	MVI_0530	2016-12-16	00:00:19	R	0	L	IMG_0385	2017-02-12	00:00:15	L	0	R	IMG_1409	2017-02-18	00:00:12	R	0	L	MVI_1889
2016-11-17	00:00:08	R	0	L	DSCN0434	2016-11-30	00:00:13	R	0	L	MVI_0531	2016-12-16	00:00:08	R	0	L	IMG_0386	2017-02-12	00:00:25	R	0	L	IMG_1410	2017-02-18	00:00:12	R	0	L	MVI_1890
2016-11-17	00:00:08	L	1	L	DSCN0435	2016-11-30	00:00:16	R	1	R	MVI_0532	2016-12-16	00:00:18	R	0	L	IMG_0387	2017-02-12	00:03:00	R	0	L	IMG_1412	2017-02-18	00:00:11	L	1	L	MVI_1891
2016-11-17	00:00:08	R	0	L	DSCN0437	2016-11-30	00:00:17	L	1	L	MVI_0533	2016-12-16	00:00:12	L	1	L	IMG_0388	2017-02-12	00:06:36	R	0	L	IMG_1413	2017-02-18	00:00:11	L	1	L	MVI_1892
2016-11-17	00:00:06	L	0	R	DSCN0438	2016-11-30	00:00:16	L	1	L	MVI_0534	2016-12-16	00:02:15	L	1	L	IMG_0389	2017-02-12	00:02:13	L	1	L	IMG_1414	2017-02-18	00:00:16	L	1	L	MVI_1893
2016-11-17	00:00:10	R	1	R	DSCN0439	2016-11-30	00:00:35	R	0	L	MVI_0535	2016-12-16	00:00:20	R	0	L	IMG_0390	2017-02-14	00:05:47	L	1	L	MVI_1754	2017-02-18	00:00:15	R	0	L	MVI_1894
2016-11-17	00:00:07	L	1	L	DSCN0440	2016-11-30	00:00:17	R	1	R	MVI_0536	2016-12-16	00:00:30	L	1	L	IMG_0391	2017-02-14	00:06:39	L	0	R	MVI_1755	2017-02-18	00:00:33	R	0	L	MVI_1895
2016-11-22	00:00:10	R	0	L	DSCN0537	2016-12-01	00:00:09	L	1	L	IMG_0223	2016-12-17	00:03:18	R	0	L	MVI_0751	2017-02-14	00:00:23	R	0	L	MVI_1756	2017-02-19	00:00:48	R	0	L	MVI_1918
2016-11-22	00:00:07	L	1	L	DSCN0538	2016-12-01	00:00:08	L	1	L	IMG_0224	2016-12-17	00:00:12	R	0	L	MVI_0752	2017-02-14	00:00:42	R	1	R	MVI_1757	2017-02-19	00:00:17	R	0	L	MVI_1919
2016-11-22	00:00:09	R	1	R	DSCN0539	2016-12-01	00:00:11	R	1	R	IMG_0225	2016-12-17	00:00:12	L	1	L	MVI_0753	2017-02-14	00:00:16	L	1	L	MVI_1758	2017-02-19	00:00:14	R	0	L	MVI_1920
2016-11-22	00:00:07	L	1	L	DSCN0540	2016-12-01	00:00:10	R	0	L	IMG_0226	2016-12-17	00:01:25	L	1	L	MVI_0754	2017-02-14	00:00:23	L	1	L	MVI_1759	2017-02-19	00:00:16	L	1	L	MVI_1921
2016-11-22	00:00:07	R	0	L	DSCN0541	2016-12-01	00:00:10	L	1	L	IMG_0228	2016-12-17	00:00:19	R	0	L	MVI_0755	2017-02-14	00:03:20	R	0	L	MVI_1761	2017-02-19	00:00:12	L	1	L	MVI_1924
2016-11-22	00:00:08	R	0	L	DSCN0542	2016-12-01	00:00:11	R	0	L	IMG_0229	2016-12-17	00:00:12	L	1	L	MVI_0756	2017-02-14	00:00:49	R	1	R	MVI_1762	2017-02-19	00:00:10	L	1	L	MVI_1925
2016-11-22	00:00:07	L	1	L	DSCN0543	2016-12-01	00:00:29	L	1	L	IMG_0230	2016-12-17	00:00:15	R	0	L	MVI_0757	2017-02-14	00:02:49	L	0	R	MVI_1763	2017-02-19	00:00:07	R	0	L	MVI_1926
2016-11-22	00:00:15	R	1	R	DSCN0544	2016-12-01	00:00:18	R	0	L	IMG_0231	2016-12-17	00:00:13	L	1	L	MVI_0758	2017-02-14	00:00:20	L	1	L	MVI_1764	2017-02-19	00:00:11	R	0	L	MVI_1927
2016-11-22	00:00:40	L	0	R	DSCN0545	2016-12-01	00:00:18	R	0	L	IMG_0232	2016-12-17	00:01:04	R	1	R	MVI_0759	2017-02-16	00:00:16	L	1	L	MVI_1826	2017-02-19	00:00:10	L	1	L	MVI_1928
2016-11-22	00:00:20	L	0	R	DSCN0547	2016-12-01	00:00:10	L	1	L	IMG_0233	2016-12-17	00:00:09	R	0	L	MVI_0760	2017-02-16	00:00:10	L	1	L	MVI_1827	2017-02-19	00:00:12	L	1	L	MVI_1929
2016-11-23	00:00:15	R	1	R	MVI_0416	2016-12-27	00:04:33	R	0	L	MVI_0896	2016-12-18	00:00:14	L	1	L	IMG_0445	2017-02-16	00:00:14	L	1	L	MVI_1828	2017-02-20	00:01:20	L	0	R	IMG_1636
2016-11-23	00:00:10	L	0	R	MVI_0417	2016-12-27	00:00:11	R	0	L	MVI_0898	2016-12-18	00:00:12	R	0	L	IMG_0446	2017-02-16	00:00:16	R	0	L	MVI_1829	2017-02-20	00:00:16	L	1	L	IMG_1637
2016-11-23	00:00:09	L	0	R	MVI_0418	2016-12-27	00:00:10	L	1	L	MVI_0899	2016-12-18	00:00:12	L	1	L	IMG_0447	2017-02-16	00:00:18	R	0	L	MVI_1830	2017-02-20	00:00:11	L	1	L	IMG_1638
2017-11-23	00:00:11	R	1	R	MVI_0419	2016-12-27	00:00:22	L	1	L	MVI_0900	2016-12-18	00:00:16	R	0	L	IMG_0448	2017-02-16	00:00:15	R	0	L	MVI_1831	2017-02-20	00:00:11	R	0	L	IMG_1639
2017-11-23	00:00:07	R	1	R	MVI_0420	2016-12-27	00:00:14	R	1	R	MVI_0901	2016-12-18	00:00:14	R	0	L	IMG_0449	2017-02-16	00:03:00	L	1	L	MVI_1833	2017-02-20	00:00:08	R	0	L	IMG_1640
2017-11-23	00:00:07	L	1	L	MVI_0422	2016-12-27	00:00:16	R	0	L	MVI_0902	2016-12-18	00:00:14	L	1	L	IMG_0450	2017-02-16	00:00:28	R	1	R	MVI_1834	2017-02-20	00:00:10	L	1	L	IMG_1641
2017-11-23	00:00:03	R	0	L	MVI_0423	2016-12-27	00:00:17	L	1	L	MVI_0903	2016-12-18	00:00:23	R	0	L	IMG_0451	2017-02-16	00:00:13	R	0	L	MVI_1835	2017-02-20	00:00:11	L	1	L	IMG_1642
2017-11-23	00:00:02	L	1	L	MVI_0424	2016-12-27	00:00:11	R	0	L	MVI_0904	2016-12-18	00:00:14	L	0	R	IMG_0452	2017-02-16	00:00:37	R	1	R	MVI_1836	2017-02-20	00:04:34	R	0	L	IMG_1644
2017-11-23	00:00:04	R	1	R	MVI_0425	2016-12-27	00:00:25	L	0	R	MVI_0906	2016-12-18	00:00:12	R	0	L	IMG_0453	2017-02-17	00:02:07	L	1	L	MVI_1854	2017-02-20	00:00:13	R	0	L	IMG_1645
2017-11-23	00:00:05	L	0	R	MVI_0426	2016-12-27	00:00:17	R	0	L	MVI_0907	2016-12-18	00:00:22	L	1	L	IMG_0454	2017-02-17	00:00:23	L	1	L	MVI_1855	2017-02-20	00:00:14	R	0	L	IMG_1647

## Sheet: P5
Data of Task 1	start time	bait position	Correct	Selected side	Video file	Data of Task 2	start time	bait position	Correct	Selected side	Video file	Data of Task 3	start time	bait position	Correct	Selected side	Video file	Data of Task 5	start time	bait position	Correct	Selected side	Video file	Data of Task 6	start time	bait position	Correct	Selected side	Video file	Data of Task 7	start time	bait position	Correct	Selected side	Video file
2016-11-16	00:00:06	R	1	R	MVI_0284	2016-11-29	00:11:55	R	0	L	MVI_0499	2017-08-07	00:00:12	L	1	L	2017_0407_015520_008	2016-12-14	00:00:17	L	1	L	MVI_0686	2017-02-12	00:00:08	L	1	L	IMG_1417	2017-02-18	00:00:18	R	1	R	IMG_1567
2016-11-16	00:00:05	L	0	R	MVI_0285	2016-11-29	00:01:33	R	0	L	MVI_0500	2017-08-07	00:00:33	R	1	R	2017_0407_020046_009	2016-12-14	00:01:12	L	1	L	MVI_0687	2017-02-12	00:00:12	L	1	L	IMG_1418	2017-02-18	00:00:11	R	0	L	IMG_1568
2016-11-16	00:00:05	L	1	L	MVI_0286	2016-11-29	00:00:07	L	0	R	MVI_0501	2017-08-07	00:01:56	L	1	L	2017_0407_022851_013	2016-12-14	00:01:21	R	1	R	MVI_0688	2017-02-12	00:00:12	L	1	L	IMG_1419	2017-02-18	00:00:09	R	1	R	IMG_1569
2016-11-16	00:00:05	R	1	R	MVI_0287	2016-11-29	00:00:30	R	1	R	MVI_0502	2017-08-07	00:00:55	L	1	L	2017_0407_024211_015	2016-12-14	00:00:09	R	0	L	MVI_0689	2017-02-12	00:00:09	R	0	L	IMG_1420	2017-02-18	00:00:13	L	0	R	IMG_1570
2016-11-16	00:00:08	L	1	L	MVI_0289	2016-11-29	00:00:24	L	0	R	MVI_0503	2017-08-07	00:02:50	L	1	L	2017_0407_025608_017	2016-12-14	00:01:25	L	1	L	MVI_0690	2017-02-12	00:00:08	R	0	L	IMG_1421	2017-02-18	00:00:09	L	1	L	IMG_1571
2016-11-16	00:00:12	R	0	L	MVI_0292	2016-11-29	00:00:10	L	0	R	MVI_0504	2017-08-07	00:09:30	R	0	L	2017_0407_034145_024	2016-12-14	00:00:10	L	0	R	MVI_0691	2017-02-12	00:00:06	R	0	L	IMG_1422	2017-02-18	00:00:16	L	0	R	IMG_1572
2016-11-16	00:00:07	R	1	R	MVI_0296	2016-11-29	00:05:26	L	0	R	MVI_0505	2017-08-09	00:00:13	L	1	L	2017_0407_034145_024	2016-12-14	00:00:09	R	0	L	MVI_0692	2017-02-12	00:00:08	L	1	L	IMG_1423	2017-02-18	00:00:07	R	0	L	IMG_1573
2016-11-16	00:00:07	L	1	L	MVI_0297	2016-11-29	00:00:10	R	0	L	MVI_0506	2017-08-09	00:01:47	R	0	L	2017_0409_023756_003	2016-12-14	00:00:54	R	1	R	MVI_0695	2017-02-12	00:00:10	L	1	L	IMG_1424	2017-02-18	00:00:22	L	1	L	IMG_1574
2016-11-16	00:00:10	R	1	R	MVI_0298	2016-11-29	00:00:09	R	0	L	MVI_0507	2017-08-09	00:00:52	L	1	L	2017_0409_025354_005	2016-12-14	00:00:07	R	0	L	MVI_0698	2017-02-12	00:00:06	R	0	L	IMG_1425	2017-02-18	00:00:19	L	1	L	IMG_1575
2016-11-18	00:00:07	R	1	R	DSCN0441	2016-11-29	00:00:13	L	0	R	MVI_0508	2017-08-09	00:01:18	R	0	L	2017_0409_030057_006	2016-12-14	00:01:12	L	0	R	MVI_0699	2017-02-12	00:00:07	R	0	L	IMG_1426	2017-02-18	00:00:10	L	1	L	IMG_1576
2016-11-18	00:00:09	L	1	L	DSCN0443	2016-11-30	00:00:06	L	1	L	IMG_0202	2017-08-10	00:01:15	R	1	R	2017_0410_021051_014	2016-12-17	00:00:09	L	0	R	IMG_0411	2017-02-14	00:00:19	L	1	L	IMG_1450	2017-02-19	00:00:27	L	1	L	MVI_1932
2016-11-18	00:00:10	R	1	R	DSCN0445	2016-11-30	00:00:05	R	0	L	IMG_0203	2017-08-10	00:00:44	R	0	L	2017_0410_022508_016	2016-12-17	00:00:09	R	0	L	IMG_0412	2017-02-14	00:00:12	L	0	R	IMG_1451	2017-02-19	00:00:09	L	1	L	MVI_1933
2016-11-18	00:00:20	L	1	L	DSCN0446	2016-11-30	00:00:05	R	0	L	IMG_0204	2017-08-10	00:00:44	L	0	R	2017_0410_023855_018	2016-12-17	00:00:15	L	1	L	IMG_0413	2017-02-14	00:00:10	L	1	L	IMG_1452	2017-02-19	00:00:19	L	1	L	MVI_1935
2016-11-18	00:00:10	L	0	R	DSCN0451	2016-11-30	00:00:05	L	1	L	IMG_0205	2017-08-10	00:01:02	R	1	R	2017_0410_024829_020	2016-12-17	00:01:00	R	0	L	IMG_0414	2017-02-14	00:00:10	R	0	L	IMG_1453	2017-02-19	00:00:17	R	0	L	MVI_1936
2016-11-18	00:00:05	R	1	R	DSCN0452	2016-11-30	00:00:04	R	0	L	IMG_0206	2017-08-10	00:00:49	R	1	R	2017_0410_025952_022	2016-12-17	00:00:08	L	0	R	IMG_0415	2017-02-14	00:00:08	R	0	L	IMG_1454	2017-02-19	00:00:13	R	0	L	MVI_1937
2016-11-18	00:00:04	L	1	L	DSCN0453	2016-11-30	00:00:05	L	1	L	IMG_0207	2017-08-10	00:01:42	R	1	R	2017_0410_031140_024	2016-12-17	00:00:26	R	0	L	IMG_0416	2017-02-14	00:00:11	R	0	L	IMG_1455	2017-02-19	00:00:22	R	1	R	MVI_1938
2016-11-18	00:00:07	R	1	R	DSCN0455	2016-11-30	00:00:08	L	0	R	IMG_0208	2017-08-10	00:00:44	L	0	R	2017_0410_032406_026	2016-12-17	00:00:12	L	0	R	IMG_0417	2017-02-14	00:00:14	L	1	L	IMG_1456	2017-02-19	00:00:08	L	1	L	MVI_1939
2016-11-22	00:01:54	L	1	L	IMG_0029	2016-11-30	00:00:04	R	0	L	IMG_0209	2017-08-10	00:01:11	R	0	L	2017_0410_035149_029	2016-12-17	00:00:10	R	0	L	IMG_0418	2017-02-14	00:00:11	L	1	L	IMG_1457	2017-02-19	00:00:11	L	1	L	MVI_1940
2016-11-22	00:00:05	R	1	R	IMG_0030	2016-11-30	00:00:04	L	1	L	IMG_0210	2017-08-10	00:00:22	L	1	L	2017_0410_040149_030	2016-12-17	00:00:13	L	0	R	IMG_0419	2017-02-14	00:00:12	R	1	R	IMG_1458	2017-02-19	00:00:08	R	0	L	MVI_1941
2016-11-22	00:00:04	L	1	L	IMG_0031	2016-11-30	00:00:04	L	1	L	IMG_0211	2017-08-10	00:01:14	R	1	R	2017_0410_041846_032	2016-12-17	00:00:09	R	0	L	IMG_0420	2017-02-15	00:00:28	R	0	L	MVI_1776	2017-02-19	00:00:19	R	0	L	MVI_1942
2016-11-22	00:00:05	R	1	R	IMG_0032	2016-12-01	00:00:09	R	0	L	MVI_0596	2017-08-12	00:00:07	R	1	R	2017_0412_032219_001	2016-12-18	00:00:12	R	0	L	IMG_0422	2017-02-15	00:00:11	R	0	L	MVI_1777	2017-02-20	00:00:10	L	1	L	IMG_1661
2016-11-22	00:00:05	L	1	L	IMG_0033	2016-12-01	00:00:04	L	1	L	MVI_0597	2017-08-12	00:00:12	L	1	L	2017_0412_033001_002	2016-12-18	00:00:08	L	0	R	IMG_0423	2017-02-15	00:00:10	R	0	L	MVI_1778	2017-02-20	00:00:11	L	1	L	IMG_1662
2016-11-22	00:00:04	R	1	R	IMG_0034	2016-12-01	00:00:04	R	0	L	MVI_0598	2017-08-12	00:00:39	R	0	L	2017_0412_033116_003	2016-12-18	00:00:09	R	0	L	IMG_0424	2017-02-15	00:00:07	L	1	L	MVI_1779	2017-02-20	00:00:10	L	1	L	IMG_1663
2016-11-22	00:00:03	L	1	L	IMG_0035	2016-12-01	00:00:05	R	0	L	MVI_0599	2017-08-12	00:00:49	R	0	L	2017_0412_033522_004	2016-12-18	00:00:10	L	1	L	IMG_0425	2017-02-15	00:00:11	L	1	L	MVI_1780	2017-02-20	00:00:08	R	0	L	IMG_1664
2016-11-22	00:00:03	R	1	R	IMG_0036	2016-12-01	00:00:15	L	0	R	MVI_0600	2017-08-12	00:00:41	L	1	L	2017_0412_034520_005	2016-12-18	00:00:10	R	0	L	IMG_0426	2017-02-15	00:00:13	L	1	L	MVI_1781	2017-02-20	00:00:14	R	1	R	IMG_1665
2016-11-22	00:00:04	L	1	L	IMG_0037	2016-12-01	00:00:10	L	0	R	MVI_0601	2017-08-12	00:00:43	L	1	L	2017_0412_035522_006	2016-12-18	00:00:26	L	1	L	IMG_0427	2017-02-15	00:00:10	R	0	L	MVI_1782	2017-02-20	00:00:11	R	0	L	IMG_1666
2016-11-22	00:00:03	R	1	R	IMG_0038	2016-12-01	00:00:23	R	0	L	MVI_0602	2017-08-12	00:00:51	R	0	L	2017_0412_040258_007	2016-12-18	00:00:10	R	0	L	IMG_0428	2017-02-15	00:00:11	R	1	R	MVI_1783	2017-02-20	00:00:10	L	1	L	IMG_1667
2016-11-23	00:00:45	L	1	L	MVI_0428	2016-12-01	00:00:58	R	0	L	MVI_0603	2017-08-12	00:00:47	R	0	L	2017_0412_041029_008	2016-12-18	00:00:11	L	0	R	IMG_0429	2017-02-16	00:00:19	L	1	L	IMG_1496	2017-02-20	00:00:13	L	1	L	IMG_1668
2016-11-23	00:00:03	R	1	R	MVI_0429	2016-12-01	00:00:08	R	1	R	MVI_0604	2017-08-12	00:00:47	L	1	L	2017_0412_041848_009	2016-12-18	00:00:08	R	1	R	IMG_0430	2017-02-16	00:00:13	L	1	L	IMG_1497	2017-02-20	00:00:12	R	0	L	IMG_1669
2016-11-23	00:00:04	L	1	L	MVI_0432	2016-12-01	00:00:13	L	1	L	MVI_0605	2017-08-12	00:00:13	R	1	R	2017_0412_042722_010	2016-12-18	00:00:10	L	0	R	IMG_0431	2017-02-16	00:00:20	R	1	R	IMG_1498	2017-02-20	00:00:11	R	0	L	IMG_1670

## Sheet: P6
Data of Task 1	start time	bait position	Correct	Selected side	Video file	Data of Task 2	start time	bait position	Correct	Selected side	Video file	Data of Task 3	start time	bait position	Correct	Selected side	Video file	Data of Task 4	start time	bait position	Correct	Selected side	Video file	Data of Task 5	start time	bait position	Correct	Selected side	Video file	Data of Task 6	start time	bait position	Correct	Selected side	Video file
2017-02-18	00:00:04	R	1	R	MVI_1876	2017-02-25	00:00:20	R	1	R	IMG_1770	2017-08-11	00:00:36	L	1	L	MVI_2493	2017-08-17	00:00:48	R	1	R	MVI_0013	2017-03-03	00:00:30	R	0	L	IMG_1917	2017-03-17	00:00:27	R	1	R	MVI_2211
2017-02-18	00:00:03	L	1	L	MVI_1877	2017-02-25	00:00:08	R	1	R	IMG_1771	2017-08-11	00:01:27	R	1	R	MVI_2494	2017-08-17	00:00:55	R	0	L	MVI_0014	2017-03-03	00:00:24	L	0	R	IMG_1918	2017-03-17	00:00:10	R	1	R	MVI_2212
2017-02-18	00:00:04	R	1	R	MVI_1878	2017-02-25	00:00:09	L	0	R	IMG_1772	2017-08-11	00:07:18	L	1	L	MVI_2495	2017-08-17	00:00:11	R	0	L	MVI_0015	2017-03-03	00:00:15	R	0	L	IMG_1919	2017-03-17	00:00:08	R	1	R	MVI_2213
2017-02-18	00:00:04	R	0	L	MVI_1879	2017-02-25	00:00:09	L	0	R	IMG_1773	2017-08-11	00:01:04	L	1	L	MVI_2498	2017-08-17	00:00:10	L	1	L	MVI_0016	2017-03-03	00:00:22	L	1	L	IMG_1920	2017-03-17	00:00:07	L	0	R	MVI_2214
2017-02-18	00:00:13	R	0	L	MVI_1880	2017-02-25	00:00:08	R	1	R	IMG_1774	2017-08-11	00:02:37	R	0	L	MVI_2500	2017-08-17	00:00:15	L	1	L	MVI_0017	2017-03-03	00:00:30	R	1	R	IMG_1921	2017-03-17	00:00:18	L	0	R	MVI_2215
2017-02-18	00:00:05	L	1	L	MVI_1882	2017-02-25	00:00:08	L	0	R	IMG_1775	2017-08-11	00:05:45	L	0	R	MVI_2501	2017-08-17	00:00:09	L	1	L	MVI_0018	2017-03-03	00:02:06	R	0	L	IMG_1922	2017-03-17	00:00:11	L	0	R	MVI_2216
2017-02-18	00:00:27	L	0	R	MVI_1883	2017-02-25	00:00:08	R	0	L	IMG_1776	2017-08-13	00:00:11	R	1	R	MVI_2503	2017-08-17	00:00:14	R	1	R	MVI_0019	2017-03-03	00:00:41	L	1	L	IMG_1924	2017-03-17	00:00:10	R	0	L	MVI_2217
2017-02-18	00:00:05	L	1	L	MVI_1884	2017-02-25	00:00:09	L	0	R	IMG_1777	2017-08-13	00:00:06	L	1	L	MVI_2504	2017-08-17	00:00:32	R	1	R	MVI_0020	2017-03-03	00:00:17	R	0	L	IMG_1925	2017-03-17	00:00:08	R	1	R	MVI_2218
2017-02-18	00:00:07	R	0	L	MVI_1885	2017-02-25	00:00:09	R	1	R	IMG_1778	2017-08-13	00:00:06	R	1	R	MVI_2505	2017-08-17	00:00:52	R	1	R	MVI_0021	2017-03-03	00:00:23	L	0	R	IMG_1926	2017-03-17	00:00:06	L	0	R	MVI_2219
2017-02-18	00:00:18	L	1	L	MVI_2071	2017-02-25	00:00:08	L	0	R	IMG_1779	2017-08-13	00:00:07	L	1	L	MVI_2506	2017-08-18	00:00:36	L	0	R	MVI_0022	2017-03-03	00:01:57	R	0	L	IMG_1928	2017-03-17	00:00:07	L	0	R	MVI_2220
2017-02-23	00:00:06	L	1	L	IMG_1741	2017-02-26	00:00:18	L	0	R	IMG_1828	2017-08-13	00:00:06	R	1	R	MVI_2507	2017-08-18	00:00:19	L	0	R	MVI_0023	2017-03-06	00:02:26	R	0	L	IMG_2043	2017-03-18	00:00:10	L	0	R	IMG_2109
2017-02-23	00:00:07	R	0	L	IMG_1742	2017-02-26	00:00:14	L	0	R	IMG_1829	2017-08-13	00:00:06	L	1	L	MVI_2508	2017-08-18	00:00:12	R	1	R	MVI_0024	2017-03-06	00:00:38	L	1	L	IMG_2044	2017-03-18	00:00:05	L	0	R	IMG_2110
2017-02-23	00:00:08	R	0	L	IMG_1743	2017-02-26	00:00:15	R	0	L	IMG_1830	2017-08-13	00:00:09	R	1	R	MVI_2509	2017-08-18	00:00:08	R	1	R	MVI_0025	2017-03-06	00:00:35	R	1	R	IMG_2045	2017-03-18	00:00:06	L	0	R	IMG_2111
2017-02-23	00:00:05	L	1	L	IMG_1744	2017-02-26	00:00:14	R	0	L	IMG_1831	2017-08-13	00:00:11	L	1	L	MVI_2510	2017-08-18	00:00:17	R	1	R	MVI_0026	2017-03-06	00:00:20	L	1	L	IMG_2046	2017-03-18	00:00:07	R	1	R	IMG_2112
2017-02-23	00:00:05	R	1	R	IMG_1745	2017-02-26	00:00:10	R	0	L	IMG_1832	2017-08-13	00:00:07	R	1	R	MVI_2511	2017-08-18	00:00:16	L	0	R	MVI_0027	2017-03-06	00:00:14	R	0	L	IMG_2047	2017-03-18	00:00:10	R	1	R	IMG_2113
2017-02-23	00:00:08	L	1	L	IMG_1747	2017-02-26	00:00:23	R	0	L	IMG_1833	2017-08-13	00:01:46	L	1	L	MVI_2514	2017-08-18	00:00:17	L	0	R	MVI_0028	2017-03-06	00:00:18	L	1	L	IMG_2048	2017-03-18	00:00:07	R	1	R	IMG_2114
2017-02-23	00:00:19	L	1	L	IMG_1748	2017-02-26	00:00:17	L	1	L	IMG_1834	2017-08-14	00:00:12	R	1	R	MVI_2515	2017-08-18	00:00:18	R	1	R	MVI_0029	2017-03-06	00:00:17	R	0	L	IMG_2049	2017-03-18	00:00:09	L	0	R	IMG_2115
2017-02-23	00:00:10	R	1	R	IMG_1749	2017-02-26	00:00:17	L	1	L	IMG_1835	2017-08-14	00:00:07	L	1	L	MVI_2516	2017-08-18	00:01:26	R	1	R	MVI_0030	2017-03-06	00:00:17	L	1	L	IMG_2050	2017-03-18	00:00:06	L	0	R	IMG_2116
2017-02-23	00:00:18	R	1	R	IMG_1750	2017-02-26	00:01:14	R	1	R	IMG_1837	2017-08-14	00:00:16	R	1	R	MVI_2517	2017-08-18	00:04:36	L	0	R	MVI_0031	2017-03-06	00:00:14	R	0	L	IMG_2051	2017-03-18	00:00:08	R	1	R	IMG_2117
2017-02-23	00:00:18	L	1	L	IMG_1751	2017-02-26	00:00:18	L	0	R	IMG_1838	2017-08-14	00:00:13	L	1	L	MVI_2518	2017-08-19	00:00:25	R	1	R	MVI_0032	2017-03-06	00:00:21	R	0	L	IMG_2052	2017-03-18	00:00:07	R	1	R	IMG_2118
2017-02-24	00:00:18	R	0	L	MVI_2072	2017-03-02	00:00:36	R	0	L	IMG_1884	2017-08-14	00:00:18	R	1	R	MVI_2519	2017-08-19	00:01:44	R	1	R	MVI_0033	2017-03-19	00:00:11	L	1	L	IMG_2149	2017-04-19	00:00:08	L	0	R	MVI_2223
2017-02-24	00:00:18	L	1	L	MVI_2073	2017-03-02	00:00:20	L	1	L	IMG_1885	2017-08-14	00:00:38	L	1	L	MVI_2520	2017-08-19	00:00:49	L	1	L	MVI_0034	2017-03-19	00:00:07	R	1	R	IMG_2150	2017-04-19	00:00:05	L	0	R	MVI_2224
2017-02-24	00:00:15	R	0	L	MVI_2074	2017-03-02	00:00:16	R	1	R	IMG_1886	2017-08-16	00:00:30	L	1	L	MVI_0001	2017-08-19	00:00:32	R	1	R	MVI_0035	2017-03-19	00:00:07	R	1	R	IMG_2151	2017-04-19	00:00:08	L	0	R	MVI_2225
2017-02-24	00:00:12	L	1	L	MVI_2075	2017-03-02	00:00:12	R	1	R	IMG_1887	2017-08-16	00:00:12	R	1	R	MVI_0002	2017-08-19	00:00:31	R	1	R	MVI_0036	2017-03-19	00:00:07	L	0	R	IMG_2152	2017-04-19	00:00:07	R	1	R	MVI_2226
2017-02-24	00:00:17	R	0	L	MVI_2076	2017-03-02	00:00:19	L	1	L	IMG_1888	2017-08-16	00:00:41	L	0	R	MVI_0003	2017-08-19	00:00:17	R	1	R	MVI_0037	2017-03-19	00:00:10	L	0	R	IMG_2153	2017-04-19	00:00:08	R	1	R	MVI_2227
2017-02-24	00:00:09	L	1	L	MVI_2077	2017-03-02	00:00:25	L	0	R	IMG_1889	2017-08-16	00:03:17	L	1	L	MVI_0004	2017-08-21	00:00:17	R	1	R	MVI_0038	2017-03-19	00:00:09	R	0	L	IMG_2154	2017-04-19	00:00:10	R	1	R	MVI_2228
2017-02-24	00:00:14	R	0	L	MVI_2078	2017-03-02	00:00:19	R	0	L	IMG_1890	2017-08-16	00:01:47	R	1	R	MVI_0005	2017-08-21	00:00:20	L	1	L	MVI_0039	2017-03-19	00:00:08	L	0	R	IMG_2155	2017-04-19	00:00:11	L	0	R	MVI_2229
2017-02-24	00:00:07	L	1	L	MVI_2079	2017-03-02	00:00:21	L	0	R	IMG_1891	2017-08-16	00:01:42	R	1	R	MVI_0006	2017-08-21	00:00:13	L	0	R	MVI_0040	2017-03-19	00:00:08	R	1	R	IMG_2156	2017-04-19	00:00:07	L	0	R	MVI_2230
2017-02-24	00:00:12	R	0	L	MVI_2080	2017-03-02	00:00:16	R	1	R	IMG_1892	2017-08-16	00:02:19	R	1	R	MVI_0007	2017-08-21	00:03:05	L	1	L	MVI_0041	2017-03-19	00:00:06	L	0	R	IMG_2157	2017-04-19	00:00:05	R	0	L	MVI_2232
2017-02-24	00:00:15	L	1	L	MVI_2081	2017-03-02	00:00:19	L	0	R	IMG_1893	2017-08-16	00:01:23	L	0	R	MVI_0008	2017-08-21	00:00:30	R	1	R	MVI_0042	2017-03-19	00:00:08	R	1	R	IMG_2158	2017-04-19	00:00:10	R	1	R	MVI_2233

## Sheet: P7
Data of Task 1	start time	bait position	o or x	Selected side	Video file	Data of Task 2	start time	bait position	o or x	Selected side	Video file	Data of Task 5	start time	bait position	o or x	Selected side	Video file	Data of Task 6	start time	bait position	o or x	Selected side	Video file	Data of Task 7	start time	bait position	o or x	Selected side	Video file
2016-11-17	00:03:08.118000	R	0	L	MVI_0301	2016-11-29	00:00:12	L	0	R	IMG_0173	2016-12-14	00:07:20	R	1	R	IMG_0352	2017-02-12	00:11:22	L	1	L	MVI_1664	2017-02-20	00:00:18	L	1	L	MVI_1954
2016-11-17	00:00:13	L	1	L	MVI_0302	2016-11-29	00:00:13	R	0	L	IMG_0174	2016-12-14	00:02:19	R	1	R	IMG_0354	2017-02-12	00:11:41	L	0	R	MVI_1667	2017-02-20	00:00:13	L	0	R	MVI_1955
2016-11-17	00:02:45	R	1	R	MVI_0303	2016-11-29	00:00:15	R	1	R	IMG_0175	2016-12-14	00:00:13	L	0	R	IMG_0355	2017-02-12	00:00:16	L	0	R	MVI_1670	2017-02-20	00:00:11	L	0	R	MVI_1956
2016-11-17	00:01:45	L	1	L	MVI_0305	2016-11-29	00:00:10	L	0	R	IMG_0176	2016-12-14	00:00:14	R	1	R	IMG_0356	2017-02-12	00:00:17	R	1	R	MVI_1676	2017-02-20	00:00:09	R	1	R	MVI_1957
2016-11-17	00:01:24	R	0	L	MVI_0306	2016-11-29	00:00:22	R	0	L	IMG_0177	2016-12-14	00:00:12	R	1	R	IMG_0357	2017-02-17	00:10:11	R	0	L	MVI_1839	2017-02-20	00:00:15	R	1	R	MVI_1958
2016-11-17	00:14:30	L	1	L	MVI_0308	2016-11-29	00:00:12	L	0	R	IMG_0178	2016-12-14	00:00:11	R	1	R	IMG_0358	2017-02-17	00:09:09	R	0	L	MVI_1842	2017-02-20	00:00:08	R	1	R	MVI_1959
2016-11-17	00:00:12	R	0	L	MVI_0311	2016-11-29	00:01:16	L	0	R	IMG_0181	2016-12-14	00:00:12	L	0	R	IMG_0359	2017-02-17	00:00:14	L	0	R	MVI_1844	2017-02-20	00:00:10	L	0	R	MVI_1960
2016-11-17	00:00:13	L	1	L	MVI_0312	2016-11-29	00:00:12	R	1	R	IMG_0182	2016-12-14	00:01:19	R	1	R	IMG_0360	2017-02-17	00:00:13	L	0	R	MVI_1846	2017-02-20	00:00:10	L	0	R	MVI_1961
2016-11-17	00:00:20	R	1	R	MVI_0313	2016-11-29	00:00:15	L	1	L	IMG_0184	2016-12-14	00:00:14	L	0	R	IMG_0361	2017-02-17	00:00:14	R	1	R	MVI_1847	2017-02-20	00:00:11	R	0	L	MVI_1962
2016-11-17	00:06:00	L	1	L	MVI_0315	2016-11-30	00:05:16	R	0	L	MVI_0538	2016-12-14	00:00:10	R	1	R	IMG_0362	2017-02-17	00:00:16	R	1	R	MVI_1848	2017-02-20	00:00:11	R	1	R	MVI_1963
2016-11-22	00:00:12	R	1	R	MVI_0376	2016-11-30	00:00:17	R	0	L	MVI_0540	2016-12-16	00:00:09	R	0	L	IMG_0369	2017-02-17	00:00:10	L	0	R	MVI_1850	2017-02-21	00:00:16	L	0	R	MVI_1995
2016-11-22	00:00:10	L	1	L	MVI_0377	2016-11-30	00:00:09	R	0	L	MVI_0541	2016-12-16	00:00:13	R	1	R	IMG_0370	2017-02-17	00:00:17	L	0	R	MVI_1851	2017-02-21	00:00:12	L	0	R	MVI_1996
2016-11-22	00:00:08	R	0	L	MVI_0378	2016-11-30	00:00:08	L	0	R	MVI_0542	2016-12-16	00:00:11	L	0	R	IMG_0371	2017-02-17	00:00:15	R	0	L	MVI_1852	2017-02-21	00:00:09	L	0	R	MVI_1997
2016-11-22	00:00:15	L	1	L	MVI_0379	2016-11-30	00:00:10	R	0	L	MVI_0543	2016-12-16	00:00:09	L	0	R	IMG_0372	2017-02-17	00:00:08	R	1	R	MVI_1853	2017-02-21	00:00:12	R	1	R	MVI_2002
2016-11-22	00:00:12	R	0	L	MVI_0380	2016-11-30	00:00:09	L	0	R	MVI_0544	2016-12-16	00:00:11	R	0	L	IMG_0373	2017-02-18	00:00:09	L	0	R	MVI_1867	2017-02-21	00:00:09	R	1	R	MVI_2003
2016-11-22	00:00:10	L	1	L	MVI_0381	2016-11-30	00:00:10	R	1	R	MVI_0545	2016-12-16	00:00:08	R	1	R	IMG_0374	2017-02-18	00:00:08	L	0	R	MVI_1868	2017-02-21	00:00:09	R	1	R	MVI_2004
2016-11-22	00:00:09	R	1	R	MVI_0382	2016-11-30	00:00:11	L	0	R	MVI_0546	2016-12-16	00:00:10	R	1	R	IMG_0375	2017-02-18	00:00:08	L	0	R	MVI_1869	2017-02-21	00:00:16	R	1	R	MVI_2005
2016-11-22	00:00:10	L	1	L	MVI_0383	2016-11-30	00:00:09	L	0	R	MVI_0547	2016-12-16	00:00:26	R	1	R	IMG_0376	2017-02-18	00:00:13	R	1	R	MVI_1870	2017-02-21	00:00:08	L	0	R	MVI_2006
2016-11-22	00:00:15	R	0	L	MVI_0384	2016-11-30	00:00:13	L	1	L	MVI_0548	2016-12-16	00:00:14	L	0	R	IMG_0377	2017-02-18	00:00:09	R	1	R	MVI_1871	2017-02-21	00:00:09	L	0	R	MVI_2007
2016-11-22	00:00:12	L	0	R	MVI_0385	2016-12-01	00:00:13	L	1	L	MVI_0549	2016-12-16	00:00:21	L	0	R	IMG_0378	2017-02-18	00:00:09	R	0	L	MVI_1872	2017-02-21	00:00:09	R	1	R	MVI_2008
2016-11-23	00:00:10	R	0	L	MVI_0407	2016-12-01	00:00:13	L	1	L	MVI_0582	2016-12-17	00:06:36	R	1	R	IMG_0398	2017-02-18	00:00:08	L	0	R	MVI_1873	2017-02-22	00:00:14	R	1	R	IMG_1704
2016-11-23	00:00:12	L	0	R	MVI_0408	2016-12-01	00:00:13	R	1	R	MVI_0583	2016-12-17	00:07:50	L	0	R	IMG_0400	2017-02-19	00:00:15	R	1	R	IMG_1588	2017-02-22	00:00:18	R	1	R	IMG_1707
2016-11-23	00:00:12	R	0	L	MVI_0409	2016-12-01	00:00:11	R	0	L	MVI_0586	2016-12-17	00:00:10	R	1	R	IMG_0401	2017-02-19	00:00:15	R	0	L	IMG_1589	2017-02-22	00:00:12	R	1	R	IMG_1708
2016-11-23	00:00:16	L	1	L	MVI_0410	2016-12-01	00:00:10	L	0	R	MVI_0587	2016-12-17	00:10:05	R	1	R	IMG_0402	2017-02-19	00:00:20	L	0	R	IMG_1593	2017-02-22	00:00:10	L	0	R	IMG_1709
2016-11-23	00:00:15	R	1	R	MVI_0411	2016-12-01	00:07:40	R	0	L	MVI_0589	2016-12-17	00:00:56	L	0	R	IMG_0403	2017-02-19	00:00:21	L	0	R	IMG_1599	2017-02-22	00:00:17	L	0	R	IMG_1710
2016-11-23	00:00:10	L	1	L	MVI_0412	2016-12-01	00:00:16	R	1	R	MVI_0590	2016-12-17	00:00:11	R	1	R	IMG_0404	2017-02-19	00:00:14	R	1	R	IMG_1601	2017-02-23	00:00:11	R	1	R	IMG_1718
2016-11-23	00:08:57	R	1	R	MVI_0413	2016-12-01	00:00:11	L	0	R	MVI_0591	2016-12-17	00:00:18	L	0	R	IMG_0405	2017-02-19	00:00:14	R	1	R	IMG_1602	2017-02-23	00:00:08	R	1	R	IMG_1719
2016-11-23	00:00:07	L	0	R	MVI_0414	2016-12-01	00:00:11	R	1	R	MVI_0592	2016-12-17	00:08:23	R	1	R	IMG_0406	2017-02-19	00:00:10	R	0	L	IMG_1603	2017-02-23	00:00:10	R	1	R	IMG_1720
2016-12-27	00:00:08	L	0	R	MVI_0880	2016-12-01	00:02:15	L	0	R	MVI_0594	2016-12-17	00:00:18	L	0	R	IMG_0407	2017-02-19	00:00:11	L	0	R	IMG_1604	2017-02-23	00:00:08	L	0	R	IMG_1721
2016-12-27	00:00:10	R	1	R	MVI_0881	2017-01-20	00:10:13	R	0	L	MVI_1212	2016-12-17	00:00:11	R	1	R	IMG_0408	2017-02-19	00:00:19	L	1	L	IMG_1605	2017-02-23	00:00:08	L	1	L	IMG_1722
	1900-01-01		2				1900-01-05		6				1900-01-07
	1900-01-19	11	14			16	1900-01-02	28	8			22	1900-01-03	27

## Sheet: P8
Data of Task 1	start time	bait position	o or x	Selected side	Video file	Data of Task 2	start time	bait position	o or x	Selected side	Video file	Data of Task 3	start time	bait position	o or x	Selected side	Video file	Data of Task 4	start time	bait position	o or x	Selected side	Video file	Data of Task 5	start time	bait position	o or x	Selected side	Video file	Data of Task 6	start time	bait position	o or x	Selected side	Video file	Data of Task 7	start time	bait position	o or x	Selected side	Video file
2016-11-18	00:00:22	R	1	R	DSCN0472	2016-11-30	00:01:30	L	0	R	MVI_0563	2017-08-07	00:00:12	L	0	R	MVI_2446	2017-08-21	00:00:10	R	0	L	MVI_0044	2016-12-14	00:00:11	R	1	R	IMG_0338	2017-02-14	00:00:23	L	1	L	MVI_1766	2017-02-18	00:03:40	L	0	R	IMG_1578
2016-11-18	00:00:09	L	1	L	DSCN0473	2016-11-30	00:00:09	L	0	R	MVI_0564	2017-08-07	00:00:11	R	1	R	MVI_2447	2017-08-21	00:00:16	R	1	R	MVI_0045	2016-12-14	00:00:09	R	0	L	IMG_0339	2017-02-14	00:00:15	L	1	L	MVI_1767	2017-02-18	00:00:22	L	0	R	IMG_1579
2016-11-18	00:00:12	R	1	R	DSCN0474	2016-11-30	00:00:11	R	0	L	MVI_0565	2017-08-07	00:03:12	L	1	L	MVI_2448	2017-08-21	00:00:55	R	1	R	MVI_0046	2016-12-14	00:00:10	L	0	R	IMG_0340	2017-02-14	00:00:09	L	1	L	MVI_1768	2017-02-18	00:00:11	L	0	R	IMG_1580
2016-11-18	00:00:10	L	1	L	DSCN0475	2016-11-30	00:00:09	R	0	L	MVI_0566	2017-08-07	00:02:12	R	0	L	MVI_2449	2017-08-21	00:03:21	L	1	L	MVI_0047	2016-12-14	00:00:14	L	0	R	IMG_0341	2017-02-14	00:00:09	R	0	L	MVI_1769	2017-02-18	00:00:09	R	0	L	IMG_1581
2016-11-18	00:00:09	L	1	L	DSCN0476	2016-11-30	00:00:12	L	0	R	MVI_0567	2017-08-07	00:08:20	R	1	R	MVI_2452	2017-08-21	00:00:20	L	1	L	MVI_0048	2016-12-14	00:00:13	R	0	L	IMG_0342	2017-02-14	00:00:17	R	0	L	MVI_1770	2017-02-18	00:00:10	R	0	L	IMG_1582
2016-11-18	00:00:14	R	0	L	DSCN0477	2016-11-30	00:00:12	L	0	R	MVI_0568	2017-08-07	00:01:52	L	1	L	MVI_2453	2017-08-21	00:00:16	L	1	L	MVI_0049	2016-12-14	00:00:11	R	0	L	IMG_0344	2017-02-14	00:00:14	R	0	L	MVI_1771	2017-02-18	00:00:12	R	0	L	IMG_1583
2016-11-18	00:00:11	L	1	L	DSCN0478	2016-11-30	00:00:14	R	0	L	MVI_0569	2017-08-08	00:00:21	L	1	L	MVI_2457	2017-08-22	00:00:05	R	0	L	MVI_0052	2016-12-14	00:01:07	R	1	R	IMG_0345	2017-02-14	00:00:08	L	0	R	MVI_1772	2017-02-18	00:00:16	L	1	L	IMG_1584
2016-11-18	00:00:13	R	1	R	DSCN0479	2016-11-30	00:00:13	L	0	R	MVI_0570	2017-08-08	00:00:24	R	0	L	MVI_2458	2017-08-22	00:00:07	L	1	L	MVI_0053	2016-12-14	00:00:08	R	1	R	IMG_0346	2017-02-14	00:00:12	L	1	L	MVI_1773	2017-02-18	00:00:25	L	0	R	IMG_1585
2016-11-18	00:00:11	L	0	R	DSCN0480	2016-11-30	00:00:13	R	0	L	MVI_0571	2017-08-08	00:09:01	R	1	R	MVI_2460	2017-08-22	00:00:16	L	1	L	MVI_0054	2016-12-14	00:00:13	L	1	L	IMG_0347	2017-02-14	00:00:18	R	0	L	MVI_1774	2017-02-18	00:00:18	R	0	L	IMG_1586
2016-11-18	00:00:10	R	1	R	DSCN0481	2016-11-30	00:00:20	R	0	L	MVI_0572	2017-08-08	00:00:47	L	1	L	MVI_2462	2017-08-22	00:00:13	L	1	L	MVI_0055	2016-12-14	00:00:13	L	0	R	IMG_0348	2017-02-14	00:00:17	R	0	L	MVI_1775	2017-02-18	00:00:16	R	0	L	IMG_1587
2016-11-23	00:00:07	L	1	L	MVI_0445	2016-12-01	00:00:07	L	0	R	MVI_0619	2017-08-08	00:10:57	L	0	R	MVI_2463	2017-08-22	00:00:33	R	1	R	MVI_0056	2016-12-27	00:00:12	R	0	L	IMG_0570	2017-02-15	00:00:07	R	1	R	MVI_1795	2017-02-20	00:00:10	L	1	L	MVI_1976
2016-11-23	00:00:06	R	0	L	MVI_0446	2016-12-01	00:00:10	L	0	R	MVI_0620	2017-08-08	00:01:01	R	0	L	MVI_2466	2017-08-22	00:00:10	R	0	L	MVI_0059	2016-12-27	00:00:08	R	0	L	IMG_0571	2017-02-15	00:00:08	R	0	L	MVI_1796	2017-02-20	00:00:09	L	1	L	MVI_1977
2016-11-23	00:00:06	L	1	L	MVI_0447	2016-12-01	00:00:11	R	0	L	MVI_0621	2017-08-09	00:00:28	R	1	R	MVI_2469	2017-08-22	00:00:08	L	1	L	MVI_0060	2016-12-27	00:00:10	L	0	R	IMG_0572	2017-02-15	00:00:08	L	1	L	MVI_1797	2017-02-20	00:00:10	L	1	L	MVI_1978
2016-11-23	00:00:07	R	0	L	MVI_0448	2016-12-01	00:00:13	R	0	L	MVI_0622	2017-08-09	00:00:11	L	1	L	MVI_2470	2017-08-22	00:00:13	L	1	L	MVI_0061	2016-12-27	00:00:14	R	0	L	IMG_0573	2017-02-15	00:00:08	L	1	L	MVI_1799	2017-02-20	00:00:11	R	0	L	MVI_1979
2016-11-23	00:00:12	L	1	L	MVI_0449	2016-12-01	00:03:28	L	0	R	MVI_0623	2017-08-09	00:00:13	R	1	R	MVI_2471	2017-08-22	00:00:17	R	1	R	MVI_0062	2016-12-27	00:00:11	L	0	R	IMG_0574	2017-02-15	00:00:12	L	1	L	MVI_1800	2017-02-20	00:00:12	R	0	L	MVI_1982
2016-11-23	00:00:07	R	1	R	MVI_0450	2016-12-01	00:00:08	L	0	R	MVI_0624	2017-08-09	00:00:12	R	0	L	MVI_2472	2017-08-22	00:00:22	R	0	L	MVI_0063	2016-12-27	00:00:12	L	0	R	IMG_0575	2017-02-15	00:00:09	R	0	L	MVI_1801	2017-02-20	00:00:12	R	0	L	MVI_1983
2016-11-23	00:00:08	L	0	R	MVI_0451	2016-12-01	00:00:08	R	0	L	MVI_0625	2017-08-09	00:00:49	L	1	L	MVI_2473	2017-08-23	00:00:08	R	1	R	MVI_0064	2016-12-27	00:00:12	R	1	R	IMG_0576	2017-02-15	00:00:11	R	0	L	MVI_1802	2017-02-20	00:00:11	L	1	L	MVI_1984
2016-11-23	00:00:10	R	0	L	MVI_0452	2016-12-01	00:00:15	R	0	L	MVI_0626	2017-08-09	00:00:12	R	1	R	MVI_2474	2017-08-23	00:00:09	R	1	R	MVI_0065	2016-12-27	00:00:31	R	0	L	IMG_0578	2017-02-15	00:00:13	L	1	L	MVI_1803	2017-02-20	00:00:07	L	1	L	MVI_1986
2016-11-29	00:00:10	R	1	R	IMG_0156	2016-12-01	00:00:14	L	0	R	MVI_0627	2017-08-09	00:00:22	L	1	L	MVI_2475	2017-08-23	00:00:06	L	1	L	MVI_0066	2016-12-30	00:00:09	R	1	R	IMG_0635	2017-02-15	00:00:16	L	1	L	MVI_1804	2017-02-20	00:00:12	R	0	L	MVI_1987
2016-11-29	00:00:11	L	1	L	IMG_0157	2016-12-01	00:00:13	R	0	L	MVI_0628	2017-08-09	00:00:12	R	1	R	MVI_2476	2017-08-23	00:00:15	L	1	L	MVI_0067	2016-12-30	00:00:13	R	0	L	IMG_0636	2017-02-15	00:00:15	L	1	L	MVI_1805	2017-02-20	00:00:08	R	0	L	MVI_1988
2016-11-29	00:00:10	R	1	R	IMG_0158	2016-12-18	00:00:08	R	0	L	MVI_0774	2017-08-09	00:02:30	R	1	R	MVI_2478	2017-08-23	00:00:10	R	1	R	MVI_0068	2016-12-30	00:00:09	R	1	R	IMG_0637	2017-02-16	00:00:28	L	1	L	MVI_1809	2017-02-21	00:00:09	L	1	L	IMG_1693
2016-11-29	00:00:12	L	0	R	IMG_0159	2016-12-18	00:00:13	L	0	R	MVI_0775	2017-08-09	00:00:24	L	0	R	MVI_2479	2017-08-23	00:00:08	L	0	R	MVI_0070	2016-12-30	00:00:30	L	0	L	IMG_0639	2017-02-16	00:00:17	L	0	R	MVI_1810	2017-02-21	00:00:11	L	1	L	IMG_1694
2016-11-29	00:00:16	R	1	R	IMG_0161	2016-12-18	00:00:11	L	1	L	MVI_0776	2017-08-10	00:00:16	L	0	R	MVI_2480	2017-08-23	00:00:04	L	0	R	MVI_0071	2016-12-30	00:00:56	L	0	L	IMG_0642	2017-02-16	00:00:17	L	1	L	MVI_1811	2017-02-21	00:00:51	L	1	L	IMG_1695
2016-11-29	00:00:11	L	0	R	IMG_0162	2016-12-18	00:00:09	R	0	L	MVI_0777	2017-08-10	00:00:14	R	1	R	MVI_2481	2017-08-23	00:00:09	R	0	L	MVI_0072	2016-12-30	00:00:12	R	0	L	IMG_0643	2017-02-16	00:00:14	R	0	L	MVI_1812	2017-02-21	00:00:14	R	0	L	IMG_1696
2016-11-29	00:00:13	R	1	R	IMG_0163	2016-12-18	00:00:10	L	0	R	MVI_0778	2017-08-10	00:00:26	L	1	L	MVI_2483	2017-08-23	00:00:20	R	0	L	MVI_0073	2016-12-30	00:00:14	R	1	R	IMG_0645	2017-02-16	00:00:07	R	0	L	MVI_1813	2017-02-21	00:00:10	R	0	L	IMG_1698
2016-11-29	00:00:13	L	0	R	IMG_0164	2016-12-18	00:00:11	R	1	R	MVI_0779	2017-08-10	00:00:11	R	0	L	MVI_2484	2017-08-23	00:00:21	R	1	R	MVI_0074	2016-12-30	00:00:13	L	0	R	IMG_0646	2017-02-16	00:00:14	R	0	L	MVI_1814	2017-02-21	00:00:11	L	1	L	IMG_1699
2016-11-29	00:00:12	R	1	R	IMG_0165	2016-12-18	00:00:10	R	0	L	MVI_0780	2017-08-10	00:00:16	R	0	L	MVI_2485	-	-	-	-	-	-	2016-12-30	00:00:08	R	0	L	IMG_0648	2017-02-16	00:00:12	L	0	R	MVI_1815	2017-02-21	00:00:13	L	1	L	IMG_1700
2016-11-29	00:00:19	L	0	R	IMG_0166	2016-12-18	00:00:13	R	1	R	MVI_0781	2017-08-10	00:00:28	L	1	L	MVI_2486	-	-	-	-	-	-	2016-12-30	00:00:12	L	1	L	IMG_0649	2017-02-16	00:00:15	R	0	L	MVI_1816	2017-02-21	00:00:15	R	0	L	IMG_1701
2017-01-25	00:04:56	R	1	R	MVI_1299	2016-12-18	00:00:20	L	1	L	MVI_0782	2017-08-10	00:00:12	R	0	L	MVI_2487	-	-	-	-	-	-	2017-01-20	00:02:55	L	1	L	IMG_0910	2017-02-16	00:00:11	R	0	L	MVI_1818	2017-02-21	00:00:22	R	0	L	IMG_1702
2017-01-25	00:00:24	L	0	R	MVI_1300	2016-12-18	00:00:21	L	0	R	MVI_0783	2017-08-10	00:00:29	L	1	L	MVI_2488	-	-	-	-	-	-	2017-01-20	00:06:50	R	0	L	IMG_0912	2017-02-16	00:00:17	L	1	L	MVI_1823	2017-02-21	00:00:11	R	0	L	IMG_1703
